# Supplementary material for: Active Transportation on a Complete Street: Perceived and Audited Walkability Correlates
Source: MDPI journal article supplement (doi:10.3390/ijerph14091014), 2017-09-05
Supplement: s1 [file s1]

Table S1  
CFA factor correlations

|                        | Correlation: |                        |                |            |                    |                     |
|------------------------|--------------|------------------------|----------------|------------|--------------------|---------------------|
|                        | Access       | Street<br>Connectivity | Infrastructure | Aesthetics | Traffic<br>Hazards | Crime<br>Indicators |
| Access                 | -            |                        |                |            |                    |                     |
| Street<br>Connectivity | 0.49         | -                      |                |            |                    |                     |
| Infrastructure         | 0.36         | 0.59                   | -              |            |                    |                     |
| Aesthetics             | 0.44         | 0.61                   | 0.62           | -          |                    |                     |
| Traffic Hazards        | -0.40        | -0.42                  | -0.50          | -0.55      | -                  |                     |
| Crime<br>Indicators    | -0.10        | -0.07                  | -0.39          | -0.35      | 0.72               | -                   |

*Note.* Correlations are standardized correlations. All correlations > 0.10 are significant at the  $p < .05$  level.

Table S2

Correlation matrix of variables used in confirmatory factor analysis

|                            | Variable Number |     |     |     |    |    |     |     |     |     |     |     |     |     |     |     |     |     |     |     |
|----------------------------|-----------------|-----|-----|-----|----|----|-----|-----|-----|-----|-----|-----|-----|-----|-----|-----|-----|-----|-----|-----|
|                            | 1               | 2   | 3   | 4   | 5  | 6  | 7   | 8   | 9   | 10  | 11  | 12  | 13  | 14  | 15  | 16  | 17  | 18  | 19  | 20  |
| <b>Access</b>              |                 |     |     |     |    |    |     |     |     |     |     |     |     |     |     |     |     |     |     |     |
| 1. Stores close            | -               | 54  | 19  | 13  | 26 | 5  | 11  | 13  | 12  | 13  | 8   | 15  | -8  | -11 | 2   | -6  | -8  | -6  | -5  | -7  |
| 2. Many places to go       | 54              | -   | 30  | 8   | 23 | 8  | 19  | 15  | 18  | 32  | 30  | 28  | -17 | -17 | -10 | -17 | -20 | -12 | -12 | -10 |
| 3. Transit easy walk       | 19              | 3   | -   | 6   | 11 | 1  | 12  | 2   | 16  | 11  | 6   | 11  | -13 | -9  | 6   | -8  | -6  | -8  | -4  | -5  |
| <b>Street connectivity</b> |                 |     |     |     |    |    |     |     |     |     |     |     |     |     |     |     |     |     |     |     |
| 4. Close intersections     | 13              | 8   | 6   | -   | 24 | 19 | 6   | 12  | 12  | 14  | 18  | 13  | -5  | -14 | 6   | 1   | 1   | -3  | 0   | 3   |
| 5. Alternative routes      | 26              | 23  | 11  | 24  | -  | 9  | 19  | 25  | 25  | 26  | 20  | 16  | -6  | -8  | 1   | -7  | -5  | -1  | -5  | -2  |
| 6. Few cul-de-sacs         | 5               | 8   | 1   | 19  | 9  | -  | 7   | 8   | 16  | 12  | 7   | 14  | -4  | -3  | 4   | -4  | -5  | -1  | 8   | 8   |
| <b>Infrastructure</b>      |                 |     |     |     |    |    |     |     |     |     |     |     |     |     |     |     |     |     |     |     |
| 7. Well lit at night       | 11              | 19  | 12  | 6   | 19 | 7  | -   | 44  | 31  | 37  | 32  | 28  | -12 | -16 | -11 | -22 | -21 | -17 | -16 | -19 |
| 8. Pedestrians visible     | 13              | 15  | 2   | 12  | 25 | 8  | 44  | -   | 29  | 25  | 24  | 20  | -12 | -10 | 0   | -20 | -18 | -15 | -11 | -12 |
| 9. Crossing signals        | 12              | 18  | 16  | 12  | 25 | 16 | 31  | 29  | -   | 25  | 25  | 21  | -6  | -9  | -4  | -9  | -2  | -10 | -5  | -8  |
| <b>Aesthetics</b>          |                 |     |     |     |    |    |     |     |     |     |     |     |     |     |     |     |     |     |     |     |
| 10. Interesting sights     | 13              | 32  | 11  | 14  | 26 | 12 | 37  | 25  | 25  | -   | 68  | 53  | -16 | -23 | -14 | -24 | -17 | -20 | -11 | -16 |
| 11. Attractive sights      | 8               | 30  | 6   | 18  | 20 | 7  | 32  | 24  | 25  | 68  | -   | 64  | -12 | -16 | -13 | -29 | -19 | -25 | -18 | -21 |
| 12. Attractive buildings   | 15              | 28  | 11  | 13  | 16 | 14 | 28  | 20  | 21  | 53  | 64  | -   | -23 | -20 | -16 | -32 | -31 | -31 | -21 | -28 |
| <b>Traffic Hazards</b>     |                 |     |     |     |    |    |     |     |     |     |     |     |     |     |     |     |     |     |     |     |
| 13. Lots of traffic        | -8              | -17 | -13 | -5  | -6 | -4 | -12 | -12 | -6  | -16 | -12 | -23 | -   | 23  | 25  | 21  | 27  | 24  | 21  | 20  |
| 14. Traffic speed slow     | -11             | -17 | -9  | -14 | -8 | -3 | -16 | -10 | -9  | -23 | -16 | -20 | 23  | -   | 12  | 13  | 16  | 17  | 13  | 14  |
| 15. Cars speed high        | 2               | -1  | 6   | 6   | 1  | 4  | -11 | 0   | -4  | -14 | -13 | -16 | 25  | 12  | -   | 19  | 20  | 16  | 11  | 12  |
| <b>Crime indicators</b>    |                 |     |     |     |    |    |     |     |     |     |     |     |     |     |     |     |     |     |     |     |
| 16. High crime rate        | -6              | -17 | -8  | 1   | -7 | -4 | -22 | -20 | -9  | -24 | -29 | -32 | 21  | 13  | 19  | -   | 63  | 48  | 42  | 49  |
| 17. Crime unsafe night     | -8              | -2  | -6  | 1   | -5 | -5 | -21 | -18 | -2  | -17 | -19 | -31 | 27  | 16  | 20  | 63  | -   | 40  | 38  | 40  |
| 18. Gang activity          | -6              | -12 | -8  | -3  | -1 | -1 | -17 | -15 | -10 | -20 | -25 | -31 | 24  | 17  | 16  | 48  | 40  | -   | 66  | 60  |
| 19. Trouble groups         | -5              | -12 | -4  | 0   | -5 | 8  | -16 | -11 | -5  | -11 | -18 | -21 | 21  | 13  | 11  | 42  | 38  | 66  | -   | 68  |
| 20. Drug dealing place     | -7              | -1  | -5  | 3   | -2 | 8  | -19 | -12 | -8  | -16 | -21 | -28 | 20  | 14  | 12  | 49  | 40  | 60  | 68  | -   |

Note. Boldface indicates significance at  $p < .05$  level. Leading zeros and decimals were removed to save space. Full variable wording in Table 1. Single digit numbers have a leading zero.

**Table S3**

**Audited walkability items: coded so that high walkability = 1**

---

1. Presence of sidewalk buffer
  2. Presence of sidewalk
  3. Presence of curb cut
  4. Are sidewalks shaded by trees?
  5. Are crosswalks present?
  6. Presence of white painted lines at crosswalk
  7. Presence of yellow pedestrian crossing sign
  8. Presence of zebra striping at crosswalk
  9. Presence of a pedestrian walk signal
  10. Presence of a median
  11. At least 50% of block has buildings
  12. Presence of different road surface or paving
  13. Presence of a traffic signal
  14. Presence of a front porch
  15. Presence of a detached single family home
  16. Presence of flowers
  17. Presence of buildings with garages
  18. Absence of predominant driveways
  19. Prominence of garages
  20. Presence of street trees
  21. Presence of historic buildings
  22. Presence of decorative/unique sidewalk
  23. Presence of townhome/condo with 3 units+
  24. Speed limit above 25 mph
  25. Presence of three or more lanes of traffic
  26. Absence of a speed bump
  27. Presence of a parking lot
  28. Block is inconvenient to cross
  29. Block is unsafe to cross
  30. Low amount of parked vehicles along street
  31. No bike lanes present
  32. Absence of street and traffic signs
  33. Absence of traffic/pedestrian signals
  34. Blank walls are present on block
  35. Closed view
  36. Presence of litter
  37. Presence of bars on windows
  38. Presence of graffiti
  39. Absence of outdoor lighting
  40. Presence of freeway/overpass
-
